# Supplementary material
Source: PubMed Central journal article supplement (PMC5573591)
Supplement: NIHMS898021-supplement-Supplemental_Figures_1_and_2.pdf [file NIHMS898021-supplement-Supplemental_Figures_1_and_2.pdf]

# Supporting information.

## A visible light-sensitive caged Serotonin.

*Ricardo Cabrera<sup>1,2</sup>, Oscar Filevich<sup>3</sup>, Beatriz García-Acosta<sup>1</sup>, Jegath Athilingam<sup>4,5</sup>, Kevin J. Bender<sup>4,5</sup>, Kira E. Poskanzer<sup>\*4,6</sup> and Roberto Etchenique<sup>\*1</sup>*

<sup>1</sup> Departamento de Química Inorgánica, Analítica y Química Física, INQUIMAE, Facultad de Ciencias Exactas y Naturales, Universidad de Buenos Aires, CONICET, Ciudad Universitaria Pabellón 2, AR1428EHA Buenos Aires, Argentina.

<sup>2</sup> Ciclo Básico Común, Universidad de Buenos Aires, 1053, Buenos Aires, Argentina

<sup>3</sup> Laboratorio de Neurobiología Molecular, BIOMED, UCA, CONICET, Buenos Aires, Argentina.

<sup>4</sup> UCSF Weill Institute for Neuroscience, Kavli Institute for Fundamental Neuroscience

<sup>5</sup> Department of Neurology, University of California, San Francisco

<sup>6</sup> Department of Biochemistry and Biophysics, University of California, San Francisco, CA 94143

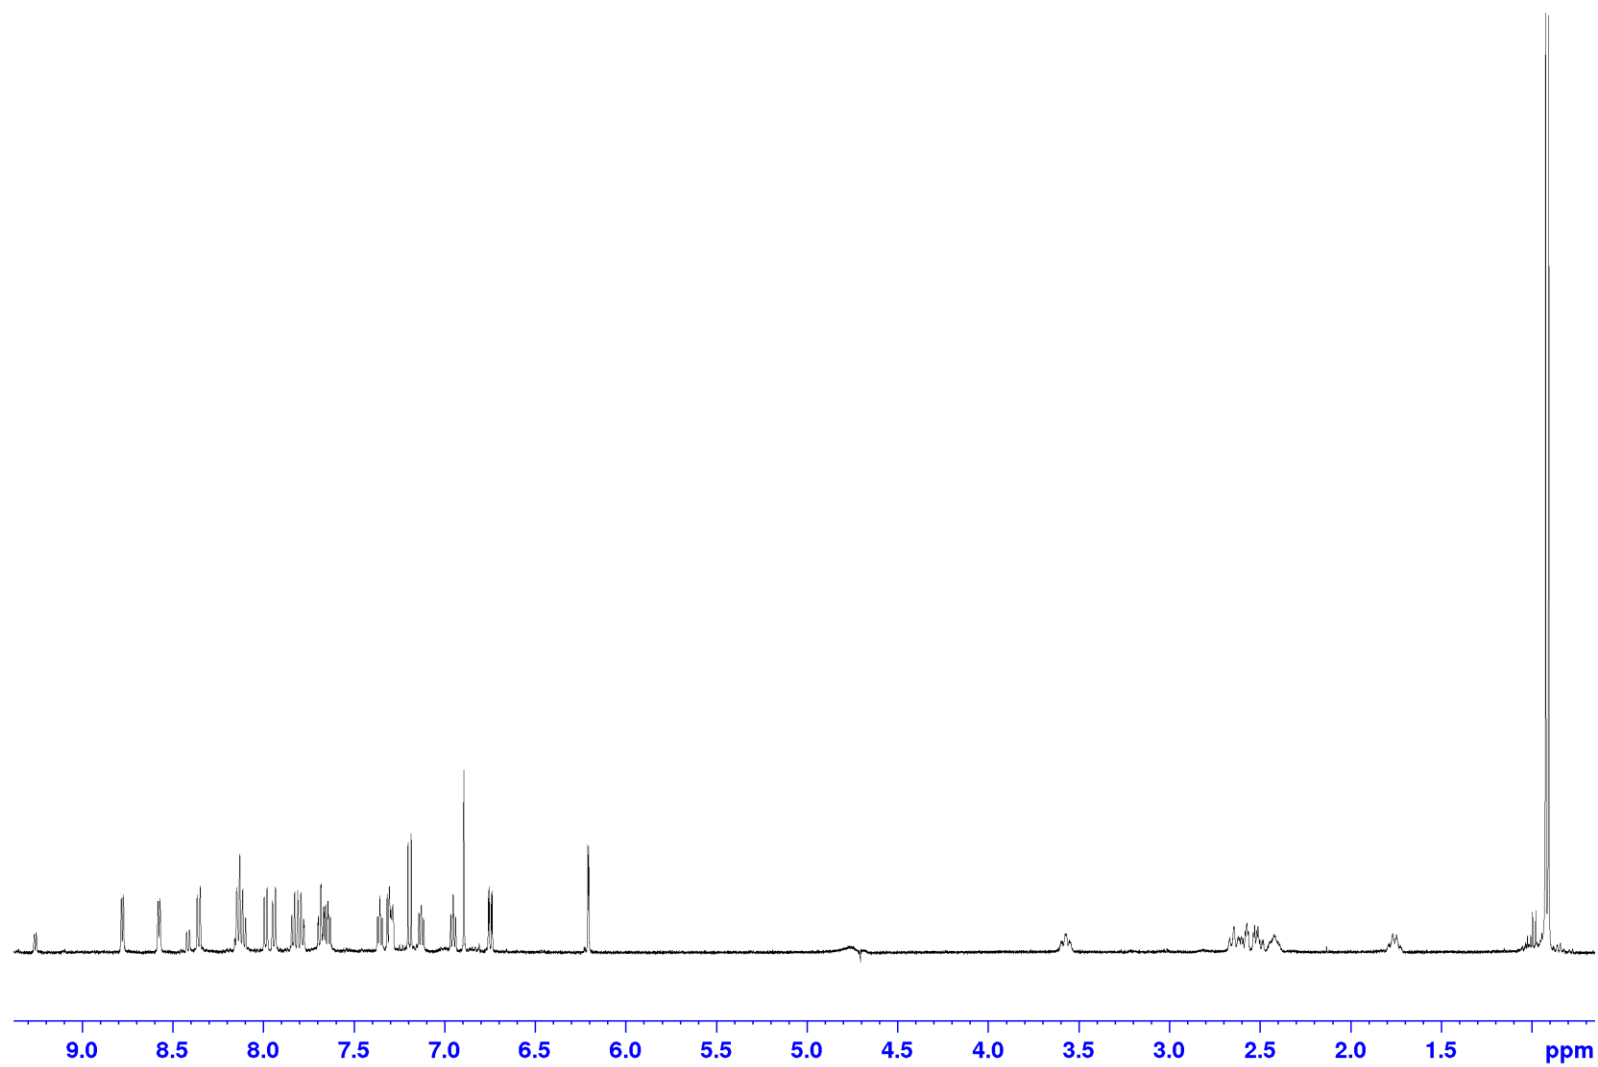

Figure S1.  $^1\text{H}$ -NMR spectra of  $[\text{Ru}(\text{bpy})_2(\text{PMe}_3)(5\text{HT})]\text{Cl}$  in  $\text{D}_2\text{O}$ .

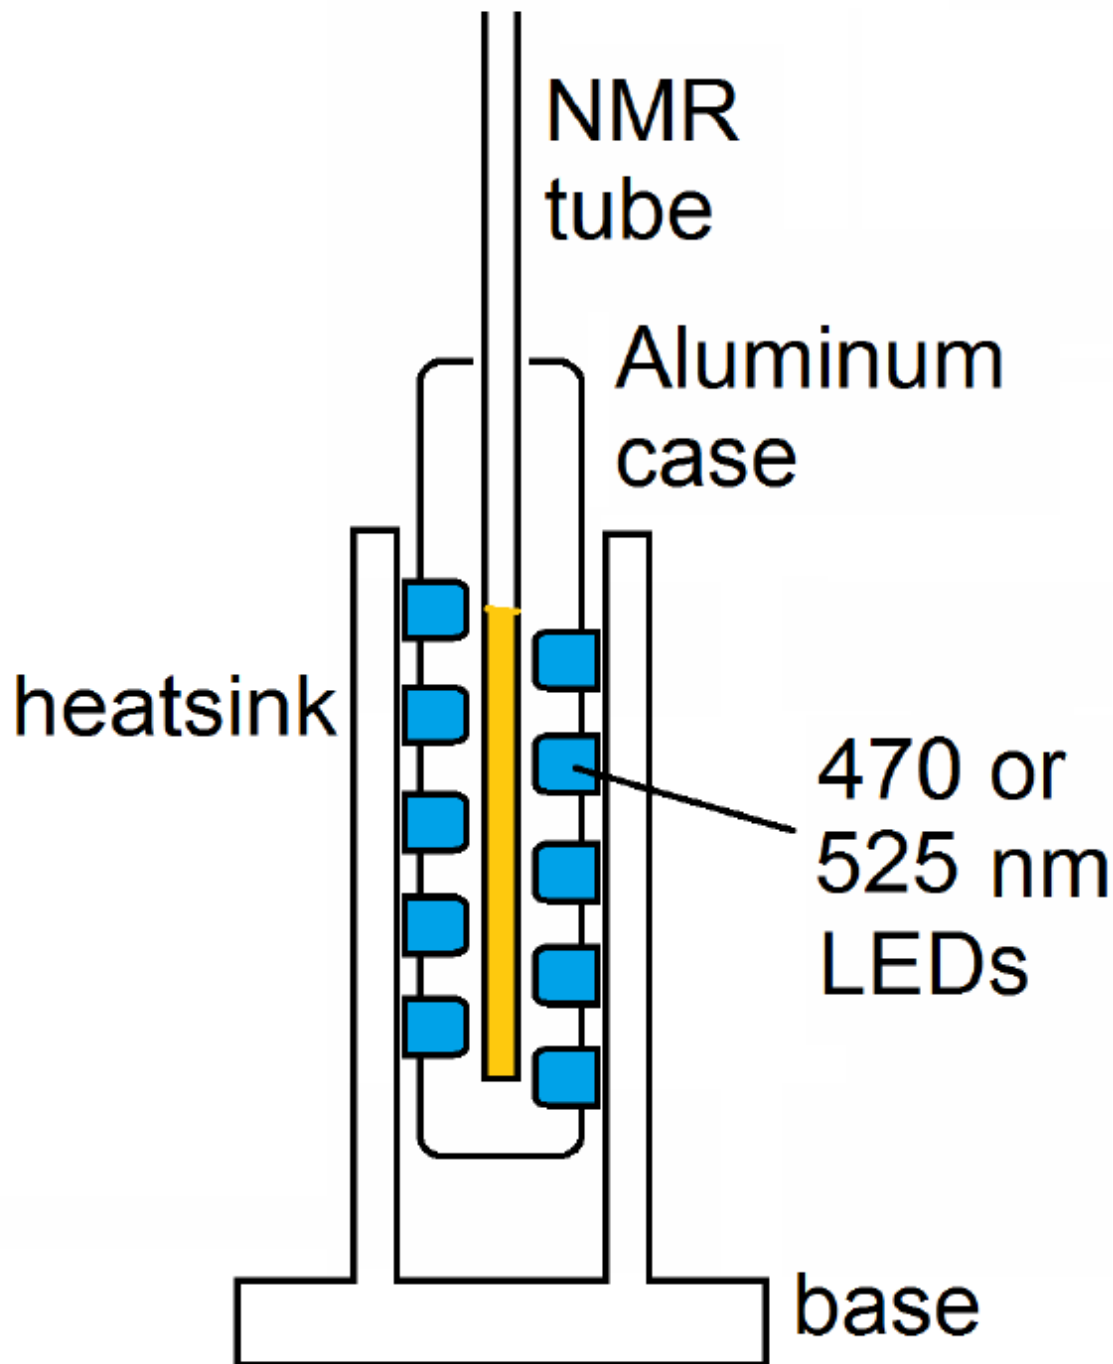

Figure S2. Scheme of the setup used to perform the uncaging procedure into the unopened NMR tube. 1W blue (470 nm) or green (532 nm) emitters were used to illuminate the sample through the tube walls, ensuring that all the sample is irradiated. The heatsink and aluminum case temperature can be kept cold with an ice/water bath.
